# Supplementary material for: Burden changes in notifiable infectious diseases in Taiwan during the COVID-19 pandemic
Source: PeerJ. 2024 Sep 9;12:e18048. doi: 10.7717/peerj.18048 (PMC11391939; doi:10.7717/peerj.18048)
Supplement: Supplemental Information 2 [file peerj-12-18048-s002.xlsx]

## Sheet: Case & Death
	Number of cases (2010 year)										Number of deaths (2010 year)			Number of cases (2020 year)										Number of deaths (2020 year)
Disease	<1	1~4	5~14	15~24	25~39	40~64	>=65	Female	Male	Total	Deaths		Disease	<1	1~4	5~14	15~24	25~39	40~64	>=65	Female	Male	Total	Deaths
Airborne/droplet transmitted diseases													Airborne/droplet transmitted diseases
Tuberculosis	2	14	65	632	1362	4162	7000	4106	9131	13237	654		Tuberculosis	0	7	15	180	518	2383	4720	2410	5413	7823	460
Complicated Varicella	358	865	4555	1367	1685	354	34	4166	5052	9218	2		Complicated Varicella	3	2	3	2	13	23	8	20	34	54	1
Mumps	5	218	547	93	117	118	27	435	690	1125	0		Mumps	5	80	200	26	63	97	27	210	288	498	2
Pertussis	24	8	10	3	10	6	0	27	34	61	0		Pertussis	4	0	0	0	0	1	0	2	3	5	0
Influenza Case with Severe Complications	4	37	77	69	114	208	373	383	499	882	58		Influenza Case with Severe Complications	1	11	6	6	34	185	201	161	283	444	184
Invasive Haemophilus Influenzae Type b Infection	0	4	3	0	1	2	2	5	7	12	22		Invasive Haemophilus Influenzae Type b Infection	0	0	0	0	0	2	1	1	2	3	15
Legionnaires' Disease	0	0	0	2	6	44	50	17	85	102	0		Legionnaires' Disease	0	0	0	0	2	137	187	62	264	326	0
Q fever	0	0	0	3	22	51	13	5	84	89	0		Q fever	0	0	0	0	4	8	2	2	12	14	0
Multidrug-Resistant Tuberculosis	0	0	1	5	22	71	57	44	112	156	0		Multidrug-Resistant Tuberculosis	0	0	0	3	6	25	40	21	53	74	0
Measles	1	2	1	3	5	0	0	7	5	12	0		Measles	0	0	0	0	0	0	0	0	0	0	0
Rubella	0	0	1	3	12	5	0	9	12	21	0		Rubella	0	0	0	0	0	0	0	0	0	0	0
Meningococcal Meningitis	1	1	0	1	3	0	1	2	5	7	0		Meningococcal Meningitis	2	0	0	2	0	0	2	1	5	6	0
Hantavirus Syndrome	0	0	0	0	1	0	0	0	1	1	0		Hantavirus Syndrome	0	0	0	1	2	8	0	7	4	11	0
Severe Pneumonia with Novel Pathogens	0	0	0	0	0	0	0	0	0	0	0		Severe Pneumonia with Novel Pathogens	0	3	4	201	356	211	48	430	393	823	7
Fecal-oral transmitted diseases	<1	1~4	5~14	15~24	25~39	40~64	>=65	Female	Male	Total			Fecal-oral transmitted diseases	<1	1~4	5~14	15~24	25~39	40~64	>=65	Female	Male	Total
Amoebiasis	0	0	1	38	139	55	29	125	137	262	2		Amoebiasis	0	0	0	27	158	50	15	92	158	250	0
Shigellosis	0	18	39	28	45	29	13	83	89	172	0		Shigellosis	0	0	2	22	91	31	5	26	125	151	0
Acute Hepatitis A	0	2	7	20	49	22	10	48	62	110	1		Acute Hepatitis A	0	0	0	6	9	27	32	41	33	74	0
Acute Flaccid Paralysis and Poliomyelitis	3	15	31	0	0	0	0	19	30	49	6		Acute Flaccid Paralysis and Poliomyelitis	3	9	21	0	0	0	0	17	16	33	13
Botulinus	0	0	0	2	2	5	2	6	5	11	0		Botulinus	1	0	0	0	0	0	0	0	1	1	0
Typhoid Fever	0	4	6	6	8	5	4	16	17	33	0		Typhoid Fever	0	1	1	1	5	1	1	7	3	10	0
Paratyphoid Fever	0	0	0	1	7	4	0	12	0	12	0		Paratyphoid Fever	0	0	0	0	0	0	0	0	0	0	0
Toxoplasmosis	1	0	0	0	3	1	0	3	2	5	0		Toxoplasmosis	0	0	0	1	4	12	0	7	10	17	1
Cholera	1	0	0	0	1	2	1	2	3	5	1		Cholera	0	0	0	0	0	0	1	0	1	1	0
Acute Hepatitis E	0	0	0	0	3	3	1	4	3	7	0		Acute Hepatitis E	0	0	0	0	0	5	2	2	5	7	0
Listeriosis	0	0	0	0	0	0	0	0	0	0	0		Listeriosis	2	0	0	2	13	46	79	66	76	142	1
Direct-contact transmitted diseases	<1	1~4	5~14	15~24	25~39	40~64	>=65	Female	Male	Total			Direct-contact transmitted diseases	<1	1~4	5~14	15~24	25~39	40~64	>=65	Female	Male	Total
Leptospirosis	0	0	0	8	21	40	8	13	64	77	0		Leptospirosis	0	0	0	4	17	44	21	10	76	86	0
Melioidosis	0	0	0	0	2	31	12	11	34	45	5		Melioidosis	0	0	0	0	0	10	10	2	18	20	0
Tetanus	2	0	0	0	0	4	6	7	5	12	1		Tetanus	0	0	0	0	2	2	4	4	4	8	1
Hansen’s Disease	0	0	0	0	2	2	1	3	2	5	3		Hansen’s Disease	0	0	0	0	5	2	0	4	3	7	0
Vector-borne transmitted diseases	<1	1~4	5~14	15~24	25~39	40~64	>=65	Female	Male	Total			Vector-borne transmitted diseases	<1	1~4	5~14	15~24	25~39	40~64	>=65	Female	Male	Total
Dengue Fever	0	12	128	219	453	771	334	963	933	1917	3		Dengue Fever	0	1	1	17	42	53	23	46	91	137	0
Scrub Typhus	0	6	11	54	89	196	46	161	241	402	0		Scrub Typhus	1	2	15	43	60	215	86	173	249	422	0
Japanese Encephalitis	0	1	0	2	9	17	4	11	22	33	0		Japanese Encephalitis	1	0	0	0	2	17	1	7	14	21	0
Malaria	0	0	0	3	8	10	0	3	18	21	0		Malaria	0	0	0	0	1	0	1	1	1	2	0
Lyme Disease	0	0	0	0	0	0	0	0	0	0	0		Lyme Disease	0	0	0	0	1	0	0	0	1	1	0
Zika Virus Infection	0	0	0	0	0	0	0	0	0	0	0		Zika Virus Infection	0	0	0	1	0	1	0	0	2	2	0
Sexually transmitted and blood-borne infections	<1	1~4	5~14	15~24	25~39	40~64	>=65	Female	Male	Total			Sexually transmitted and blood-borne infections	<1	1~4	5~14	15~24	25~39	40~64	>=65	Female	Male	Total
Gonorrhea	1	0	2	588	1290	358	26	185	2080	2265	0		Gonorrhea	1	2	30	2321	3573	1097	58	685	6397	7082	0
Syphilis	21	0	3	713	2017	2337	1391	1888	4594	6482	2		Syphilis	0	1	8	935	4003	2041	1811	1427	7372	8799	3
Human immunodeficiency virus (HIV) infection	0	0	2	468	975	321	30	66	1730	1796	115		Human immunodeficiency virus (HIV) infection	0	0	1	315	784	272	18	34	1356	1390	80
Acquired immunodeficiency syndrome (AIDS)	0	0	0	126	591	349	21	71	1016	1087	0		Acquired immunodeficiency syndrome (AIDS)	0	0	0	65	434	287	14	35	765	800	0
Acute Hepatitis B	0	0	0	24	88	49	11	73	99	172	165		Acute Hepatitis B	0	0	0	7	40	54	7	36	72	108	198
Acute Hepatitis C	0	0	1	2	12	15	11	19	22	41	54		Acute Hepatitis C	0	0	1	27	232	220	122	124	478	602	70
Acute Hepatitis D	0	0	0	0	0	1	0	0	1	1	0		Acute Hepatitis D	0	0	0	0	0	0	0	0	0	0	0

## Sheet: Cases of airborne diseases
Onset date	Tuberculosis	Invasive Haemophilus influenza Type b infection	Influenza cases with severe complication	COVID-19		Tuberculosis	2010						Invasive Haemophilus influenza Type b infection	2010						Influenza cases with severe complication	2010
201001	1027	0	44			1	1027						1	0						1	44
201002	913	0	13			2	913						2	0						2	13
201003	1144	2	10			3	1144						3	2						3	10
201004	1127	3	14			4	1127						4	3						4	14
201005	1193	0	57			5	1193						5	0						5	57
201006	1166	1	59			6	1166						6	1						6	59
201007	1142	1	122			7	1142						7	1						7	122
201008	1134	0	238			8	1134						8	0						8	238
201009	1118	2	157			9	1118						9	2						9	157
201010	1100	0	73			10	1100						10	0						10	73
201011	1149	0	36			11	1149						11	0						11	36
201012	1024	3	59			12	1024						12	3						12	59
201601	787	0	240
201602	736	1	1047			Tuberculosis	2016	2017	2018	2019	Average		Invasive Haemophilus influenza Type b infection	2016	2017	2018	2019	Average		Influenza cases with severe complication	2016	2017	2018	2019	Average
201603	876	1	448			1	787	731	822	767	776.75		1	0	0	0	0	0		1	240	48	217	254	189.75
201604	882	2	74			2	736	711	576	588	652.75		2	1	1	1	0	0.75		2	1047	52	246	256	400.25
201605	990	2	13			3	876	836	808	735	813.75		3	1	1	0	0	0.5		3	448	46	121	136	187.75
201606	938	1	8			4	882	719	806	751	789.5		4	2	0	1	0	0.75		4	74	50	40	133	74.25
201607	882	4	10			5	990	839	854	787	867.5		5	2	0	2	0	1		5	13	126	40	113	73
201608	936	2	10			6	938	938	810	711	849.25		6	1	0	0	0	0.25		6	8	347	46	163	141
201609	833	0	17			7	882	876	797	760	828.75		7	4	1	0	1	1.5		7	10	385	109	239	185.75
201610	815	1	49			8	936	973	816	808	883.25		8	2	0	1	0	0.75		8	10	138	99	243	122.5
201611	843	0	103			9	833	802	717	620	743		9	0	2	0	0	0.5		9	17	52	84	263	104
201612	810	0	65			10	815	826	776	751	792		10	1	0	0	0	0.25		10	49	27	51	133	65
201701	731	0	48			11	843	766	717	763	772.25		11	0	1	0	1	0.5		11	103	24	46	131	76
201702	711	1	52			12	810	742	689	691	733		12	0	0	0	1	0.25		12	65	64	97	261	121.75
201703	836	1	46
201704	719	0	50			Tuberculosis	2020	2021	2022		Average		Invasive Haemophilus influenza Type b infection	2020	2021	2022		Average		Influenza cases with severe complication	2020	2021	2022		Average
201705	839	0	126			1	633	565	540		579.333		1	0	0	0		0		1	375	0	0		125
201706	938	0	347			2	621	499	426		515.333		2	0	0	0		0		2	65	0	0		21.6667
201707	876	1	385			3	693	687	569		649.667		3	1	0	1		0.666667		3	1	1	0		0.666667
201708	973	0	138			4	644	640	568		617.333		4	2	1	0		1		4	0	0	0		0
201709	802	2	52			5	618	582	555		585		5	0	0	0		0		5	1	0	0		0.333333
201710	826	0	27			6	657	503	463		541		6	0	0	0		0		6	1	0	0		0.333333
201711	766	1	24			7	687	478	572		579		7	0	0	1		0.333333		7	0	0	0		0
201712	742	0	64			8	647	600	600		615.667		8	0	0	0		0		8	0	0	0		0
201801	822	0	217			9	659	645	627		643.667		9	0	0	0		0		9	0	0	0		0
201802	576	1	246			10	630	610	521		587		10	0	0	0		0		10	0	0	2		0.666667
201803	808	0	121			11	646	648	595		629.667		11	0	0	0		0		11	0	0	11		3.66667
201804	806	1	40			12	688	605	581		624.667		12	0	0	0		0		12	1	0	9		3.33333
201805	854	2	40
201806	810	0	46			COVID-19	2020	2021	2022		Average
201807	797	0	109			1	19	116	1821		652
201808	816	1	99			2	26	30	1662		572.667
201809	717	0	84			3	330	87	3181		1199.33
201810	776	0	51			4	61	108	120457		40208.7
201811	717	0	46			5	9	8924	1982715		663883
201812	689	0	97			6	6	4871	1677413		560763
201901	767	0	254			7	29	778	801180		267329
201902	588	0	256			8	17	316	737507		245947
201903	735	0	136			9	25	209	1162287		387507
201904	751	0	133			10	53	167	1242340		414187
201905	787	0	113			11	120	207	581708		194012
201906	711	0	163			12	128	490	543900		181506
201907	760	1	239
201908	808	0	243
201909	620	0	263
201910	751	0	133
201911	763	1	131
201912	691	1	261
202001	633	0	375	19
202002	621	0	65	26
202003	693	1	1	330
202004	644	2	0	61
202005	618	0	1	9
202006	657	0	1	6
202007	687	0	0	29
202008	647	0	0	17
202009	659	0	0	25
202010	630	0	0	53
202011	646	0	0	120
202012	688	0	1	128
202101	565	0	0	116
202102	499	0	0	30
202103	687	0	1	87
202104	640	1	0	108
202105	582	0	0	8924
202106	503	0	0	4871
202107	478	0	0	778
202108	600	0	0	316
202109	645	0	0	209
202110	610	0	0	167
202111	648	0	0	207
202112	605	0	0	490
202201	540	0	0	1821
202202	426	0	0	1662
202203	569	1	0	3181
202204	568	0	0	120457
202205	555	0	0	1982715
202206	463	0	0	1677413
202207	572	1	0	801180
202208	600	0	0	737507
202209	627	0	0	1162287
202210	521	0	2	1242340
202211	595	0	11	581708
202212	581	0	9	543900

## Sheet: Cases of sexually diseases
Onset date	HIV/AIDS	Acute Hepatitis B/D	Acute Hepatitis C	COVID-19		HIV/AIDS	2010						Acute Hepatitis B/D	2010						Acute Hepatitis C	2010
201001	227	13	3			1	227						1	13						1	3
201002	193	11	5			2	193						2	11						2	5
201003	268	15	2			3	268						3	15						3	2
201004	259	12	3			4	259						4	12						4	3
201005	248	22	1			5	248						5	22						5	1
201006	260	13	4			6	260						6	13						6	4
201007	242	20	6			7	242						7	20						7	6
201008	234	17	3			8	234						8	17						8	3
201009	258	5	2			9	258						9	5						9	2
201010	252	17	2			10	252						10	17						10	2
201011	262	20	3			11	262						11	20						11	3
201012	268	8	7			12	268						12	8						12	7
201601	301	4	12
201602	318	13	12			HIV/AIDS	2016	2017	2018	2019	Average		Acute Hepatitis B/D	2016	2017	2018	2019	Average		Acute Hepatitis C	2016	2017	2018	2019	Average
201603	320	5	24			1	301	315	260	324	300		1	4	17	9	11	10.25		1	12	13	37	46	27
201604	312	8	17			2	318	275	198	238	257.25		2	13	11	10	8	10.5		2	12	22	29	39	25.5
201605	368	12	21			3	320	395	287	257	314.75		3	5	15	13	7	10		3	24	26	55	55	40
201606	338	7	22			4	312	313	260	274	289.75		4	8	9	14	9	10		4	17	20	38	42	29.25
201607	303	9	12			5	368	374	313	249	326		5	12	10	7	5	8.5		5	21	24	44	60	37.25
201608	319	14	18			6	338	406	265	205	303.5		6	7	16	5	12	10		6	22	37	30	60	37.25
201609	307	10	20			7	303	310	235	238	271.5		7	9	22	17	10	14.5		7	12	37	52	47	37
201610	334	11	11			8	319	376	291	229	303.75		8	14	12	14	10	12.5		8	18	26	39	49	33
201611	299	10	14			9	307	344	251	199	275.25		9	10	5	18	8	10.25		9	20	20	30	41	27.75
201612	332	17	26			10	334	263	276	248	280.25		10	11	13	14	12	12.5		10	11	33	47	59	37.5
201701	315	17	13			11	299	307	252	187	261.25		11	10	11	10	10	10.25		11	14	27	51	56	37
201702	275	11	22			12	332	299	270	209	277.5		12	17	12	12	9	12.5		12	26	42	63	73	51
201703	395	15	26
201704	313	9	20			HIV/AIDS	2020	2021	2022		Average		Acute Hepatitis B/D	2020	2021	2022		Average		Acute Hepatitis C	2020	2021	2022		Average
201705	374	10	24			1	182	178	146		168.667		1	9	11	8		9.33333		1	47	53	32		44
201706	406	16	37			2	166	141	132		146.333		2	10	6	10		8.66667		2	66	43	26		45
201707	310	22	37			3	185	238	202		208.333		3	6	17	13		12		3	47	68	60		58.3333
201708	376	12	26			4	188	196	134		172.667		4	5	19	4		9.33333		4	45	42	41		42.6667
201709	344	5	20			5	206	147	139		164		5	10	11	5		8.66667		5	53	34	29		38.6667
201710	263	13	33			6	209	150	150		169.667		6	7	12	3		7.33333		6	55	39	35		43
201711	307	11	27			7	230	153	137		173.333		7	9	11	9		9.66667		7	60	47	36		47.6667
201712	299	12	42			8	200	185	172		185.667		8	10	11	8		9.66667		8	38	48	29		38.3333
201801	260	9	37			9	215	184	136		178.333		9	16	7	7		10		9	44	40	48		44
201802	198	10	29			10	188	168	153		169.667		10	8	16	13		12.3333		10	46	42	53		47
201803	287	13	55			11	156	172	163		163.667		11	13	7	14		11.3333		11	38	40	59		45.6667
201804	260	14	38			12	181	157	161		166.333		12	5	17	10		10.6667		12	64	64	58		62
201805	313	7	44
201806	265	5	30			COVID-19	2020	2021	2022		Average
201807	235	17	52			1	19	116	1821		652
201808	291	14	39			2	26	30	1662		572.667
201809	251	18	30			3	330	87	3181		1199.33
201810	276	14	47			4	61	108	120457		40208.7
201811	252	10	51			5	9	8924	1982715		663883
201812	270	12	63			6	6	4871	1677413		560763
201901	324	11	46			7	29	778	801180		267329
201902	238	8	39			8	17	316	737507		245947
201903	257	7	55			9	25	209	1162287		387507
201904	274	9	42			10	53	167	1242340		414187
201905	249	5	60			11	120	207	581708		194012
201906	205	12	60			12	128	490	543900		181506
201907	238	10	47
201908	229	10	49
201909	199	8	41
201910	248	12	59
201911	187	10	56
201912	209	9	73
202001	182	9	47	19
202002	166	10	66	26
202003	185	6	47	330
202004	188	5	45	61
202005	206	10	53	9
202006	209	7	55	6
202007	230	9	60	29
202008	200	10	38	17
202009	215	16	44	25
202010	188	8	46	53
202011	156	13	38	120
202012	181	5	64	128
202101	178	11	53	116
202102	141	6	43	30
202103	238	17	68	87
202104	196	19	42	108
202105	147	11	34	8924
202106	150	12	39	4871
202107	153	11	47	778
202108	185	11	48	316
202109	184	7	40	209
202110	168	16	42	167
202111	172	7	40	207
202112	157	17	64	490
202201	146	8	32	1821
202202	132	10	26	1662
202203	202	13	60	3181
202204	134	4	41	120457
202205	139	5	29	1982715
202206	150	3	35	1677413
202207	137	9	36	801180
202208	172	8	29	737507
202209	136	7	48	1162287
202210	153	13	53	1242340
202211	163	14	59	581708
202212	161	10	58	543900
